# Supplementary material for: RNAi Screening-based Identification of USP10 as a Novel Regulator of Paraptosis
Source: PubMed Central journal article supplement (PMC6427038; doi:10.1038/s41598-019-40982-z), 2019-03-20

## Supplemental Information

# RNAi Screening-based Identification of USP10 as a Novel Regulator of Paraptosis

Jin Yeop Kim<sup>1,2</sup>, Dong Min Lee<sup>1</sup>, Hyun Goo Woo<sup>3</sup>, Ki Deok Kim<sup>2</sup>, Hong Jae Lee<sup>1</sup>, Yong-Jun Kwon<sup>2,4,\*</sup> and Kyeong Sook Choi<sup>1,\*</sup>

<sup>1</sup>Department of Biochemistry, Department of Biomedical Sciences, Ajou University School of Medicine, Suwon, Korea

<sup>2</sup>Institut Pasteur Korea, 696 Sampyeong-dong, Bundang-gu, Gyeonggi-do, 463-400, South Korea

<sup>3</sup>Department of Physiology, Department of Biomedical Sciences, Ajou University School of Medicine, Suwon, Korea

<sup>4</sup>Early Discovery, Ksilink, 16, rue d'Ankara 67000 Strasbourg, France.

Correspondence:

Kyeong Sook Choi, Professor, Department of Biochemistry, Ajou University School of Medicine, Suwon, Korea. Tel: +82-31-219-4552. E-mail: [kschoi@ajou.ac.kr](mailto:kschoi@ajou.ac.kr)

Yong-Jun Kwon, Head of Early Discovery & Technology Development, Ksilink, 16, Rue d'Ankara 67000 Strasbourg, France. Tel: +33-6-3706-6662. E-mail: [yjkwonipk@gmail.com](mailto:yjkwonipk@gmail.com).

# Supplemental Materials

## Chemicals and antibodies

Nonyl Acridine Orange (NAO) and Hoechst 33342 were purchased from Molecular Probes (Eugene, OR, USA). We used antibodies against p53 and Beclin-1 (Santa Cruz biotechnology, Santa Cruz, CA); p-AMPK (Cell Signaling, Beverly, MA).

**a**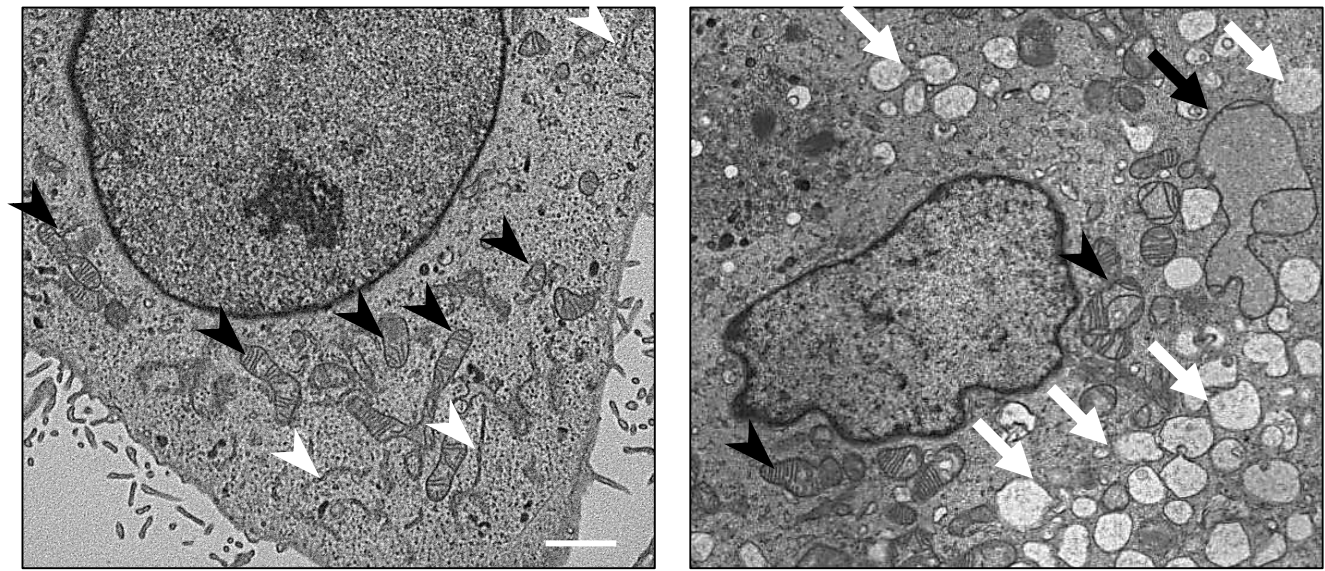**b**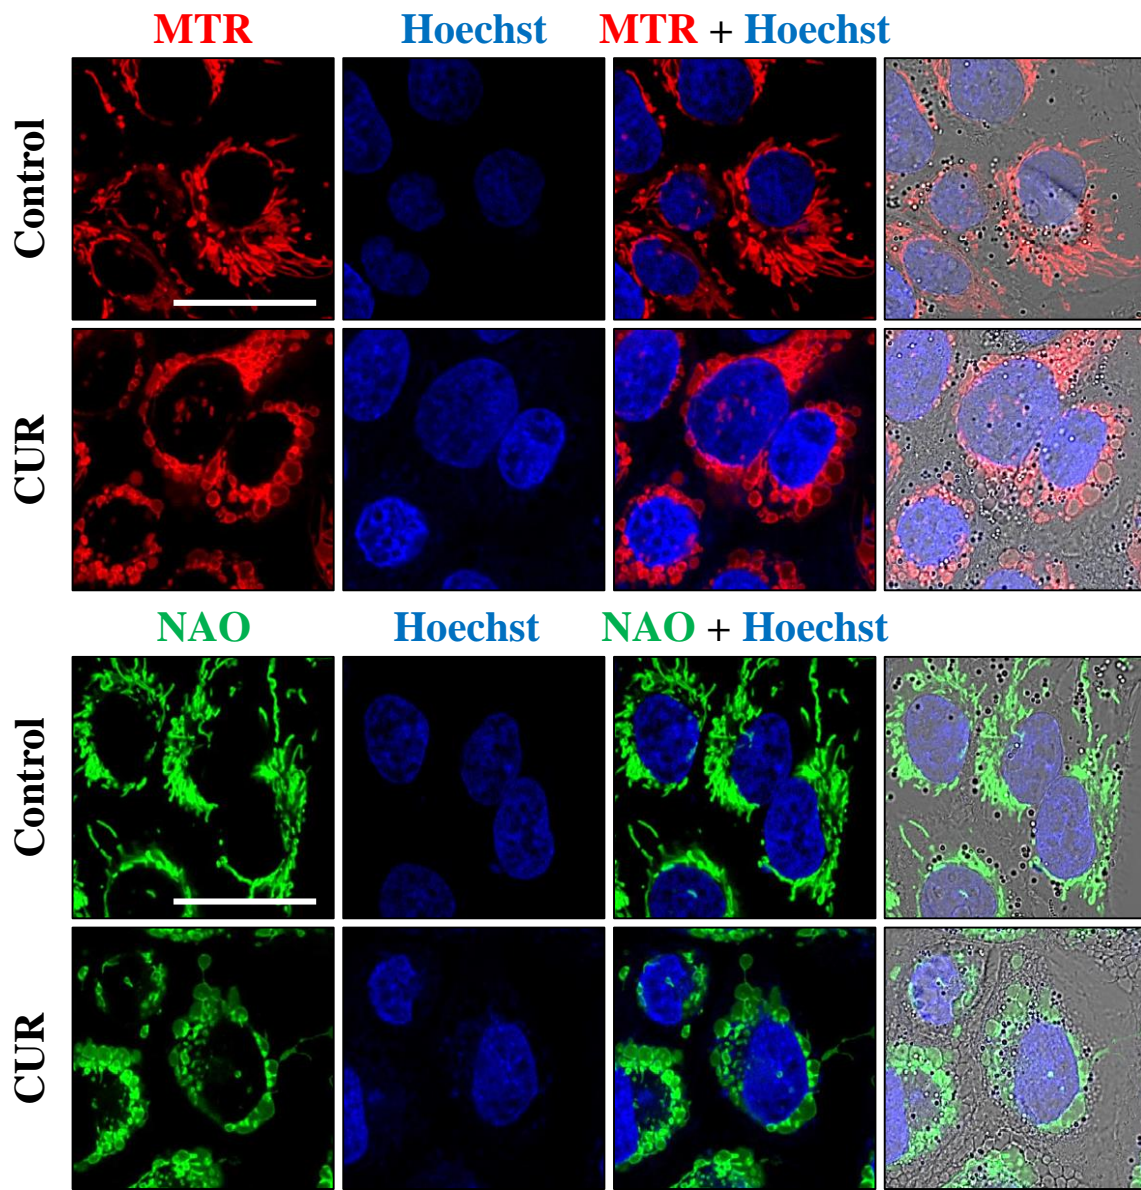

**Figure S1.** Curcumin induces mitochondrial dilation leading to megamitochondria formation. **(a)** MDA-MB 435S cells were left untreated or treated with 30  $\mu\text{M}$  curcumin for 12 h. Transmission electron microscopy was performed. The black arrowhead and white arrowhead indicate mitochondria and the ER, respectively; the black arrow and white arrow indicate dilated mitochondria and dilated ER, respectively. Bar, 2  $\mu\text{m}$ . **(b)** Cells were treated with 40  $\mu\text{M}$  curcumin for 12 h, stained with 200 nM MitoTracker Red (MTR) or 200 nM Nonyl Acridine Orange (NAO) for 20 min, and observed by confocal microscopy. Bar, 30  $\mu\text{m}$ .



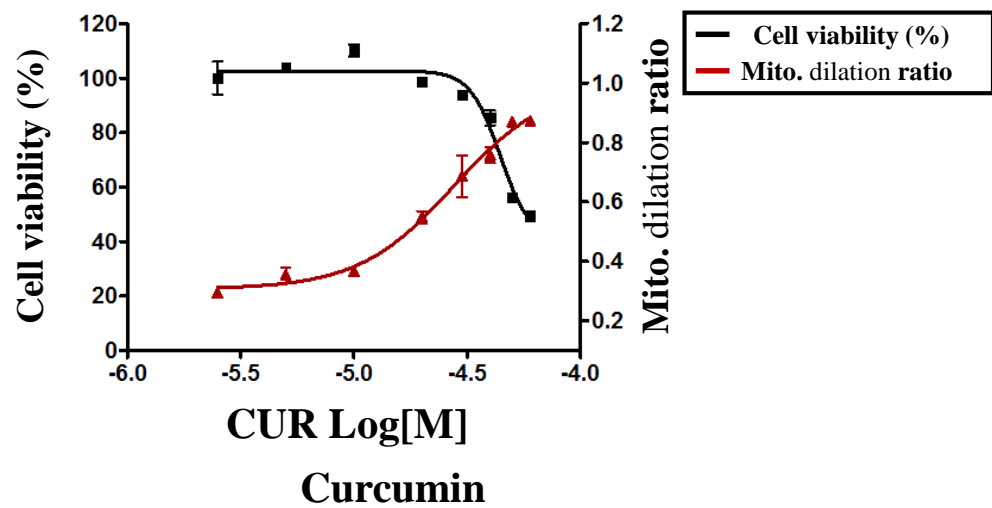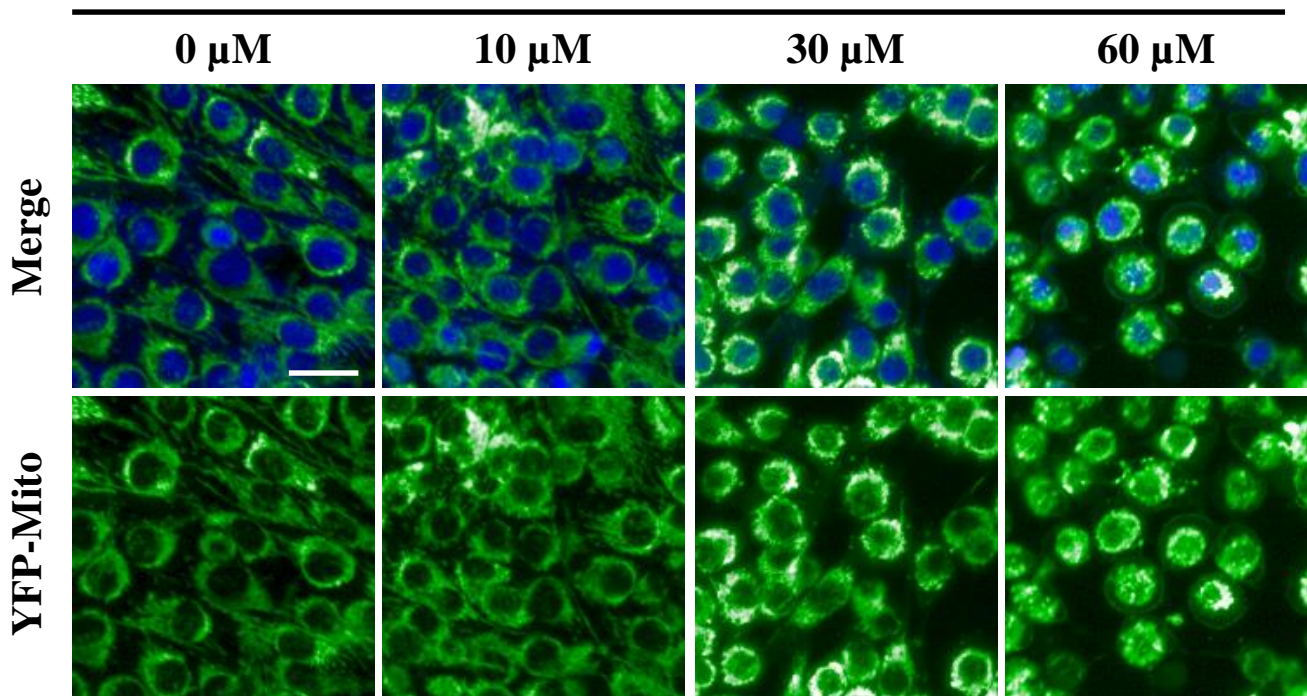

**Supplementary Figure S2.** Adapting the assay to a 384-well microtiter plate format. YFP-Mito cells were treated with the indicated concentrations of curcumin for 24 h. Viability and mitochondrial dilation ratios were quantitatively measured using the Columbus 2.3 software (upper panel). Cells were observed under an Opera microscope system. Bar, 50  $\mu\text{m}$  (lower panel).

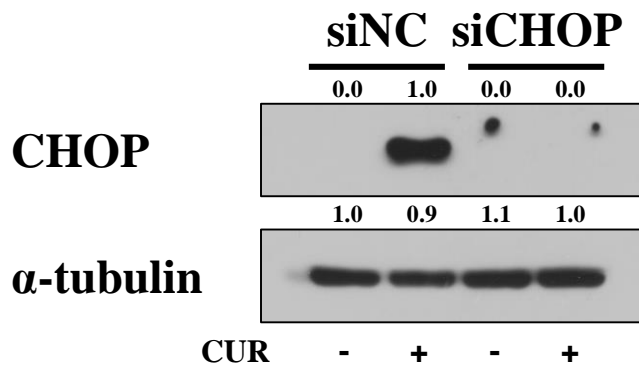

**Supplementary Figure S3.** Effect of siRNA-mediated CHOP knockdown. YFP-Mito cells were transfected with non-targeting siRNA or CHOP siRNA and further treated with 30  $\mu\text{M}$  curcumin for 12 h. Knockdown of CHOP was confirmed by Western blotting, with  $\alpha$ -tubulin detected as a loading control. Full-length blots are presented in Supplementary Figure S7.

| Selection Hits of Curcumin-Induced Mitochondrial Dilation Assay |           |          |                                  |       |               |          |                                  |
|-----------------------------------------------------------------|-----------|----------|----------------------------------|-------|---------------|----------|----------------------------------|
| Index                                                           | Name      | Locus ID | zScore:<br>Mito ratio(% Control) | Index | Name          | Locus ID | zScore:<br>Mito ratio(% Control) |
| 1                                                               | CAMK2B    | 816      | -2.95                            | 20    | UQCRC1        | 7384     | -2.37                            |
| 2                                                               | PRKACG    | 5568     | -2.78                            | 21    | TNK2          | 10188    | -2.33                            |
| 3                                                               | MARK4     | 57787    | -2.77                            | 22    | LOC51255      | 51255    | -2.25                            |
| 4                                                               | SSTR5     | 6755     | -2.68                            | 23    | MKNK2         | 2872     | -2.23                            |
| 5                                                               | TAAR5     | 9038     | -2.68                            | 24    | UBE2U         | 148581   | -2.22                            |
| 6                                                               | USP10     | 9100     | -2.61                            | 25    | MYLK          | 4638     | -2.22                            |
| 7                                                               | PRKAG3    | 53632    | -2.56                            | 26    | CTDSP2        | 10106    | -2.20                            |
| 8                                                               | PTPLB     | 201562   | -2.55                            | 27    | LCK           | 3932     | -2.18                            |
| 9                                                               | NT5C      | 30833    | -2.49                            | 28    | GPR15         | 2838     | -2.16                            |
| 10                                                              | INSRR     | 3645     | -2.49                            | 29    | KUB3          | 91419    | -2.15                            |
| 11                                                              | SSTR3     | 6753     | -2.48                            | 30    | EDG2          | 1902     | -2.11                            |
| 12                                                              | TAAR9     | 134860   | -2.48                            | 31    | PIK4CB        | 5298     | -2.10                            |
| 13                                                              | HSPB8     | 26353    | -2.45                            | 32    | DUSTYPK       | 25778    | -2.09                            |
| 14                                                              | PPAP2C    | 8612     | -2.44                            | 33    | DF            | 1675     | -2.08                            |
| 15                                                              | G6PC2     | 57818    | -2.42                            | 34    | PPP3CA        | 5530     | -2.07                            |
| 16                                                              | LOC390226 | 390226   | -2.40                            | 35    | CCR4          | 1233     | -2.07                            |
| 17                                                              | CDK4      | 1019     | -2.40                            | 36    | DKFZP761P0423 | 157285   | -2.02                            |
| 18                                                              | RGR       | 5995     | -2.40                            | 37    | CDKN3         | 1033     | -2.00                            |
| 19                                                              | GPR56     | 9289     | -2.39                            | 38    | GPR153        | 387509   | -2.00                            |

**Supplementary Table S1.** Selected hits for genes that appear to be involved in curcumin-induced mitochondrial dilation. Lists of selected hits with Z-scores < -2.

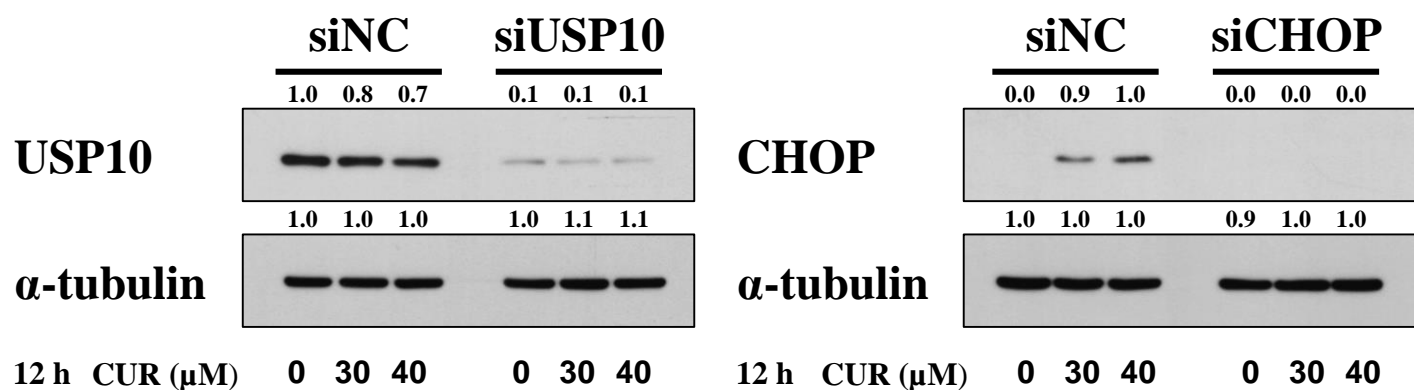

**Supplementary Figure S4.** Effect of siRNA-mediated USP10 and CHOP knockdown. YFP-Mito cells were transfected with non-targeting siRNA or CHOP siRNA and further treated with the indicated concentrations of curcumin for 12 h. Knockdown of USP10 or CHOP were confirmed by Western blotting, with  $\alpha$ -tubulin detected as a loading control. Full-length blots are presented in Supplementary Figure S7.

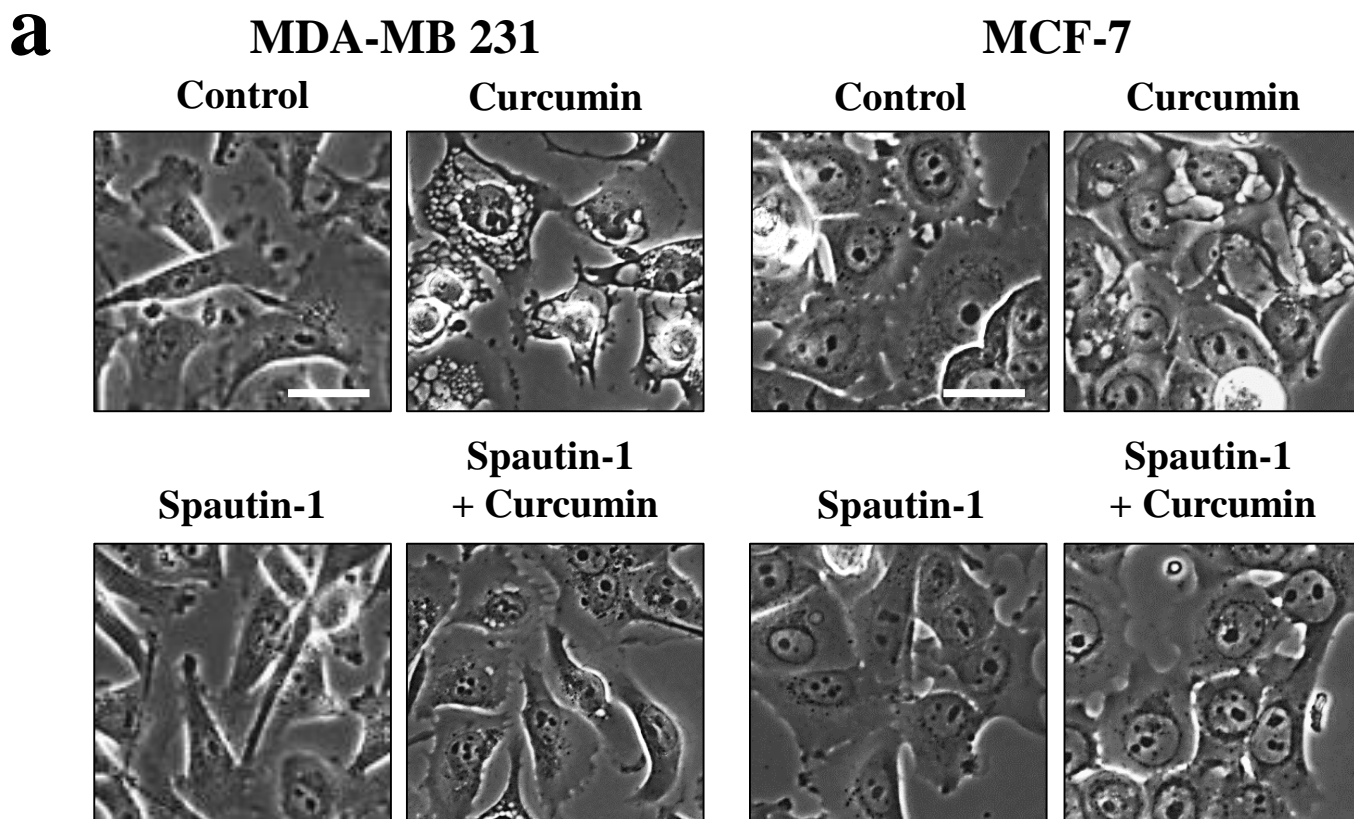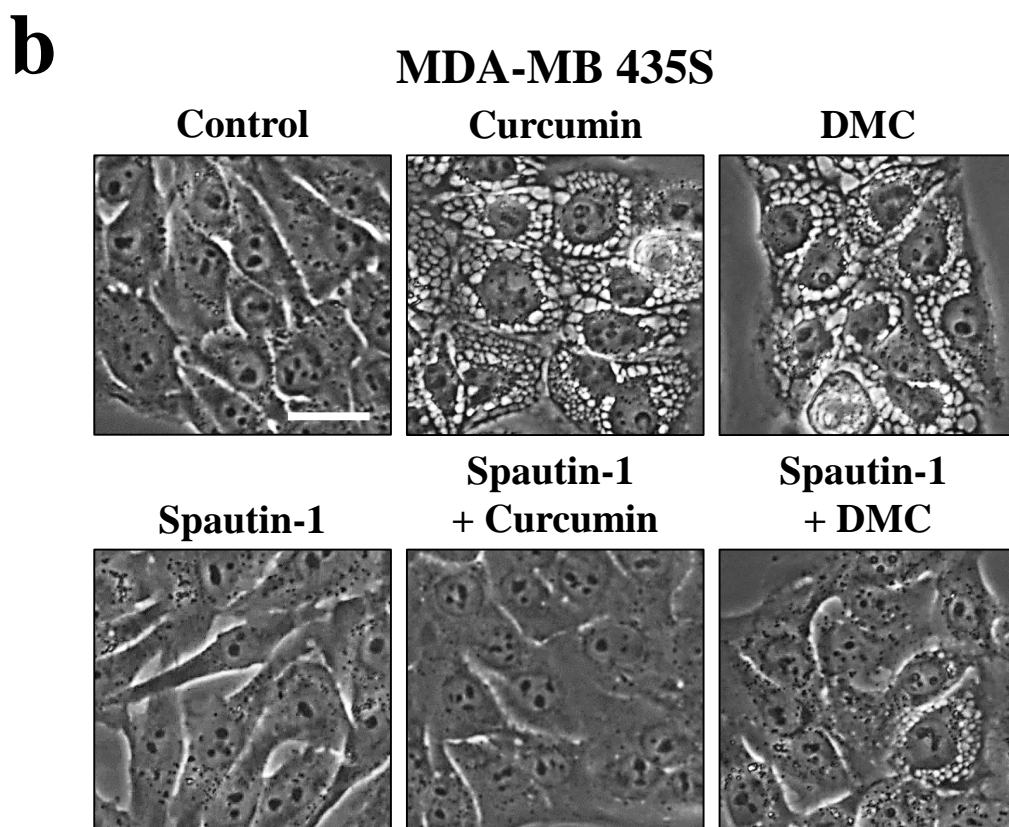

**Supplementary Figure S5.** Spautin-1 effectively inhibits curcumin-induced cytoplasmic vacuolation in various cancer cells. **(a)** MDA-MB 231 or MCF-7 cells pretreated with or without 5  $\mu$ M spautin-1 were further treated with 40  $\mu$ M curcumin for 12 h and observed by phase-contrast microscopy. Bar, 10  $\mu$ m. **(b)** MDA-MB 435S cells pretreated with or without 5  $\mu$ M spautin-1 were further treated with 40  $\mu$ M curcumin or 20  $\mu$ M DMC for 12 h and observed by phase-contrast microscopy. Bar, 10  $\mu$ m.

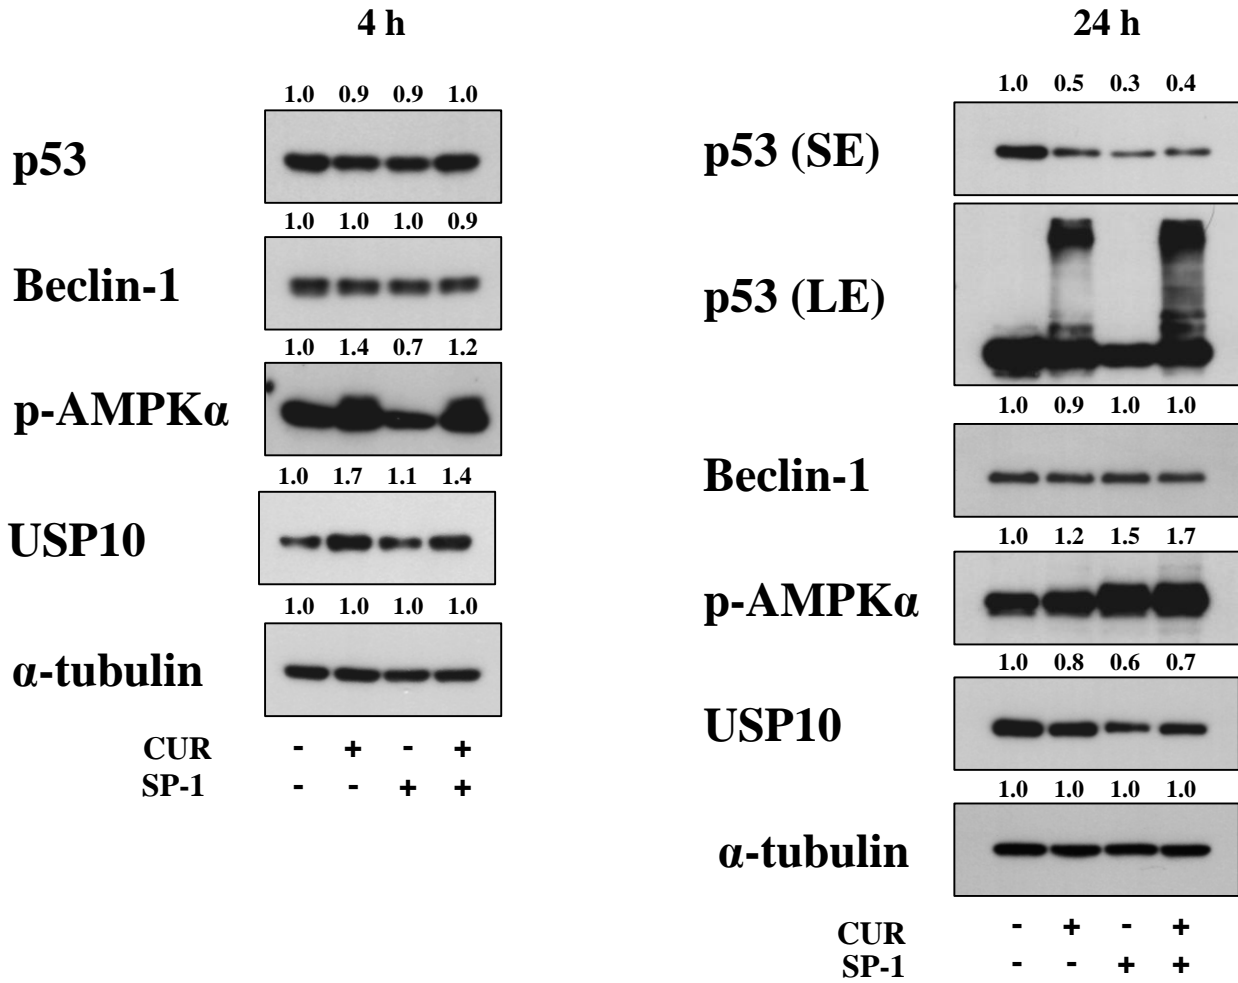

**Supplementary Figure S6.** MDA-MB 435S cells treated with 40  $\mu$ M curcumin and/or 10  $\mu$ M spautin-1 for the indicated time points were subjected to Western blotting of the indicated proteins, with  $\alpha$ -tubulin detected as a loading control. Full-length blots are presented in Supplementary Figure S7.

Fig. 6a

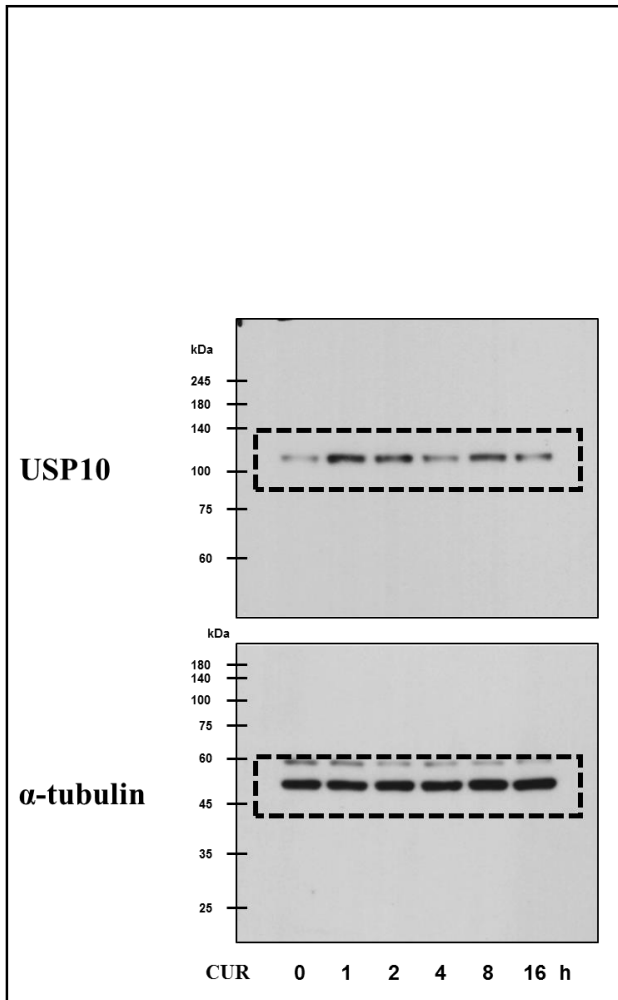

Fig. 6b

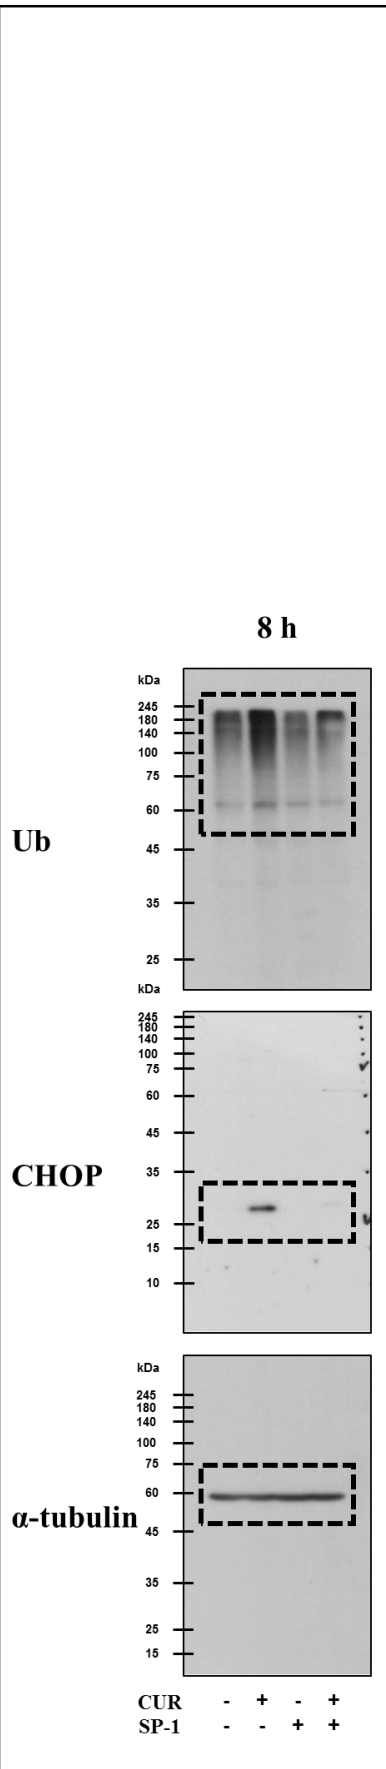

Fig. 6c

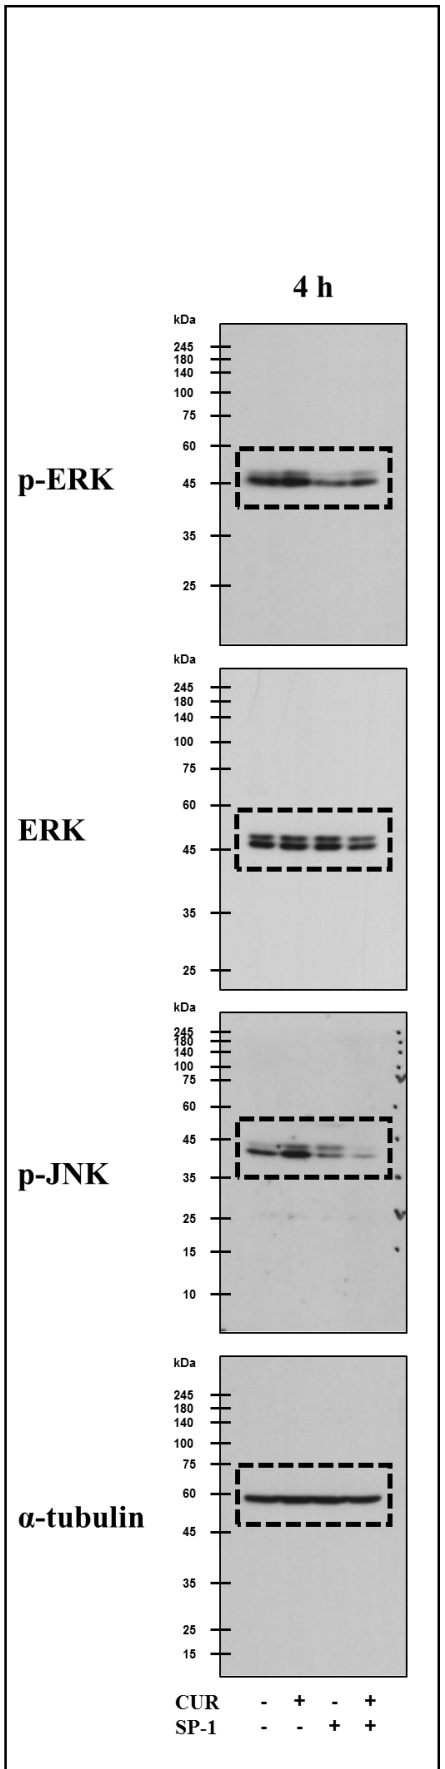

Supplementary Fig. S3

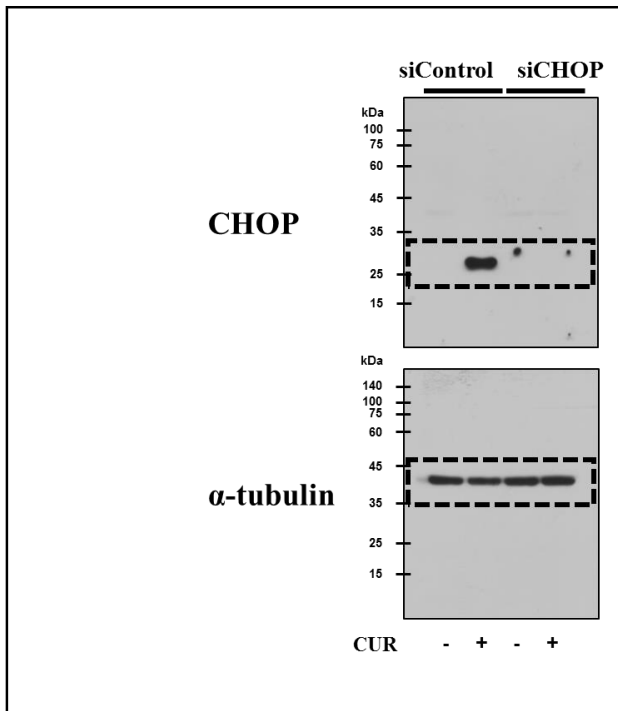

Supplement: 41598_2019_40982_MOESM1_ESM.pdf [file 41598_2019_40982_MOESM1_ESM.pdf]
